# Supplementary material
Source: PubMed Central journal article supplement (PMC6065076)
Supplement: ASN.2018010036SupplementaryData1.pdf [file ASN.2018010036SupplementaryData1.pdf]

## Supplementary material

**Supplementary table 1.** Multivariable linear regression analysis of association between proteinuria reduction and baseline variables.

|                                                         | <b>Coefficient</b>     | <b>P-value</b> |
|---------------------------------------------------------|------------------------|----------------|
| <b>Male sex</b>                                         | -0.24                  | 0.086          |
| <b>Age, years</b>                                       | 0.03                   | 0.078          |
| <b>Conventional blood pressure control</b>              | 0.06                   | 0.618          |
| <b>Diagnosis group</b>                                  |                        |                |
| - <b>Glomerulopathies</b>                               | 0.00 (reference group) |                |
| - <b>CAKUT</b>                                          | 0.00                   | 0.990          |
| - <b>Other</b>                                          | -0.28                  | 0.307          |
| <b>Baseline eGFR, 10 ml/min/1.73m<sup>2</sup></b>       | -0.05                  | 0.407          |
| <b>Baseline ambulatory MAP, SDS</b>                     | 0.04                   | 0.323          |
| <b>Baseline urinary protein:creatinine ratio, mg/mg</b> | -0.14                  | <0.001         |
| <b>Baseline serum urea, mmol/L</b>                      | 0.01                   | 0.457          |
| <b>ACE I/D genotype</b>                                 |                        |                |
| - <b>II genotype</b>                                    | 0.00 (reference group) |                |
| - <b>ID genotype</b>                                    | 0.15                   | 0.375          |
| - <b>DD genotype</b>                                    | 0.22                   | 0.262          |

**Supplementary table 2.** Multivariable Cox proportional hazards model with association between interaction between proteinuria reduction and baseline proteinuria and the composite renal endpoint

|                                                         | <b>Hazard ratio</b>    | <b>95% confidence interval</b> | <b>P-value</b> |
|---------------------------------------------------------|------------------------|--------------------------------|----------------|
| <b>Proteinuria reduction, per 10% reduction</b>         | 0.93                   | 0.88 – 0.98                    | 0.012          |
| <b>Baseline Urinary protein/creatinine ratio, mg/mg</b> | 1.35                   | 1.19 – 1.54                    | <0.001         |
| <b>Proteinuria reduction * baseline proteinuria</b>     | 1.15                   | 0.97 – 1.38                    | 0.115          |
| <b>Male sex</b>                                         | 0.91                   | 0.55 – 1.51                    | 0.708          |
| <b>Age, years</b>                                       | 1.08                   | 1.01 – 1.15                    | 0.019          |
| <b>Baseline ambulatory MAP, SDS</b>                     | 1.21                   | 1.03 – 1.41                    | 0.018          |
| <b>Diagnosis group</b>                                  |                        |                                |                |
| - <b>Glomerulopathies</b>                               | 1.00 (reference group) |                                |                |
| - <b>CAKUT</b>                                          | 0.58                   | 0.31 – 1.05                    | 0.074          |
| - <b>Other</b>                                          | 0.85                   | 0.38 – 1.88                    | 0.690          |
| <b>Baseline eGFR, ml/min/1.73m<sup>2</sup></b>          | 0.93                   | 0.91 – 0.94                    | <0.001         |
| <b>Ambulatory MAP reduction, SDS</b>                    | 0.89                   | 0.74 – 1.06                    | 0.185          |

**Supplementary table 3.** Multivariable Cox proportional hazards model with association between interaction between proteinuria reduction and blood pressure reduction and the composite renal endpoint

|                                                         | <b>Hazard ratio</b>    | <b>95% confidence interval</b> | <b>P-value</b> |
|---------------------------------------------------------|------------------------|--------------------------------|----------------|
| <b>Proteinuria reduction, per 10% reduction</b>         | 0.90                   | 0.86 – 0.95                    | <0.001         |
| <b>Ambulatory MAP reduction, SDS</b>                    | 0.84                   | 0.70 – 1.01                    | 0.064          |
| <b>Proteinuria reduction * MAP reduction</b>            | 0.83                   | 0.66 – 1.04                    | 0.104          |
| <b>Male sex</b>                                         | 0.90                   | 0.54 – 1.49                    | 0.684          |
| <b>Age, years</b>                                       | 1.08                   | 1.01 – 1.15                    | 0.025          |
| <b>Baseline ambulatory MAP, SDS</b>                     | 1.20                   | 1.02 – 1.40                    | 0.024          |
| <b>Diagnosis group</b>                                  |                        |                                |                |
| - <b>Glomerulopathies</b>                               | 1.00 (reference group) |                                |                |
| - <b>CAKUT</b>                                          | 0.56                   | 0.30 – 1.02                    | 0.057          |
| - <b>Other</b>                                          | 0.80                   | 0.36 – 1.77                    | 0.580          |
| <b>Baseline eGFR, ml/min/1.73m<sup>2</sup></b>          | 0.92                   | 0.91 – 0.94                    | <0.001         |
| <b>Baseline urinary protein:creatinine ratio, mg/mg</b> | 1.24                   | 1.12 – 1.38                    | <0.001         |

**Supplementary table 4.** Sensitivity analysis: Adjusted cox proportional hazards model with association between initial proteinuria reduction and composite renal end point (proteinuria reduction analysed as continuous measure)

|                                                         | <b>Hazard ratio</b>    | <b>95% confidence interval</b> | <b>P-value</b> |
|---------------------------------------------------------|------------------------|--------------------------------|----------------|
| <b>Proteinuria reduction, per 10% reduction</b>         | 0.93                   | 0.90 – 0.96                    | <0.001         |
| <b>Male sex</b>                                         | 0.89                   | 0.54 – 1.47                    | 0.649          |
| <b>Age, years</b>                                       | 1.07                   | 1.00 – 1.14                    | 0.040          |
| <b>Baseline ambulatory MAP, SDS</b>                     | 1.22                   | 1.04 – 1.42                    | 0.014          |
| <b>Diagnosis group</b>                                  |                        |                                |                |
| - <b>Glomerulopathies</b>                               | 1.00 (reference group) |                                |                |
| - <b>CAKUT</b>                                          | 0.58                   | 0.32 – 1.05                    | 0.072          |
| - <b>Other</b>                                          | 0.82                   | 0.37 – 1.79                    | 0.614          |
| <b>Baseline eGFR, ml/min/1.73m<sup>2</sup></b>          | 0.93                   | 0.91 – 0.94                    | <0.001         |
| <b>Baseline urinary protein/creatinine ratio, mg/mg</b> | 1.24                   | 1.12 – 1.37                    | <0.001         |
| <b>Ambulatory MAP reduction, SDS</b>                    | 0.89                   | 0.74 – 1.06                    | 0.182          |

**Supplementary table 5.** Sensitivity analysis: Adjusted cox proportional hazards model with association between initial proteinuria reduction and composite renal end point (subjects with baseline proteinuria < 0.1 mg/mg excluded). n=254

|                                                         | <b>Hazard ratio</b>    | <b>95% confidence interval</b> | <b>P-value</b> |
|---------------------------------------------------------|------------------------|--------------------------------|----------------|
| <b>Proteinuria reduction</b>                            |                        |                                |                |
| - <30%                                                  | 1.00 (reference group) |                                |                |
| - 30-60%                                                | 0.75                   | 0.43 – 1.33                    | 0.324          |
| - >60%                                                  | 0.43                   | 0.23 – 0.83                    | 0.011          |
| <b>Male sex</b>                                         | 0.78                   | 0.47 – 1.30                    | 0.347          |
| <b>Age, years</b>                                       | 1.07                   | 1.00 – 1.14                    | 0.057          |
| <b>Baseline ambulatory MAP, SDS</b>                     | 1.18                   | 1.00 – 1.39                    | 0.051          |
| <b>Diagnosis group</b>                                  |                        |                                |                |
| - Glomerulopathies                                      | 1.00 (reference group) |                                |                |
| - CAKUT                                                 | 0.56                   | 0.30 – 1.03                    | 0.063          |
| - Other                                                 | 0.71                   | 0.31 – 1.63                    | 0.413          |
| <b>Baseline eGFR, ml/min/1.73m<sup>2</sup></b>          | 0.93                   | 0.91 – 0.95                    | <0.001         |
| <b>Baseline urinary protein/creatinine ratio, mg/mg</b> | 1.22                   | 1.10 – 1.35                    | <0.001         |
| <b>Ambulatory MAP reduction, SDS</b>                    | 0.90                   | 0.75 – 1.08                    | 0.271          |

**Supplementary table 6.** Sensitivity analysis: Adjusted cox proportional hazards model with association between initial proteinuria reduction and composite renal end point (subjects with baseline proteinuria >90<sup>th</sup> percentile (3.2 mg/mg) excluded). n=254

|                                                         | <b>Hazard ratio</b>    | <b>95% confidence interval</b> | <b>P-value</b> |
|---------------------------------------------------------|------------------------|--------------------------------|----------------|
| <b>Proteinuria reduction, per 10% reduction</b>         | 0.93                   | 0.89 – 0.96                    | <0.001         |
| <b>Male sex</b>                                         | 0.78                   | 0.44 – 1.37                    | 0.396          |
| <b>Age, years</b>                                       | 1.06                   | 0.99 – 1.14                    | 0.086          |
| <b>Baseline ambulatory MAP, SDS</b>                     | 1.11                   | 0.91 – 1.36                    | 0.284          |
| <b>Diagnosis group</b>                                  |                        |                                |                |
| - <b>Glomerulopathies</b>                               | 1.00 (reference group) |                                |                |
| - <b>CAKUT</b>                                          | 0.67                   | 0.29 – 1.52                    | 0.336          |
| - <b>Other</b>                                          | 1.23                   | 0.47 – 3.22                    | 0.675          |
| <b>Baseline eGFR, ml/min/1.73m<sup>2</sup></b>          | 1.92                   | 1.34 – 2.76                    | <0.001         |
| <b>Baseline urinary protein/creatinine ratio, mg/mg</b> | 0.92                   | 0.90 – 0.94                    | <0.001         |
| <b>Ambulatory MAP reduction, SDS</b>                    | 0.94                   | 0.74 – 1.18                    | 0.581          |

**Supplementary table 7.** Sensitivity analysis: Adjusted cox proportional hazards model with association between initial proteinuria reduction and composite renal end point (subjects with additional antihypertensive therapy excluded). n=142

|                                                         | <b>Hazard ratio</b>    | <b>95% confidence interval</b> | <b>P-value</b> |
|---------------------------------------------------------|------------------------|--------------------------------|----------------|
| <b>Proteinuria reduction, per 10% reduction</b>         | 0.92                   | 0.87 – 0.98                    | 0.006          |
| <b>Male sex</b>                                         | 0.59                   | 0.26 – 1.33                    | 0.209          |
| <b>Age, years</b>                                       | 1.05                   | 0.93 – 1.17                    | 0.444          |
| <b>Baseline ambulatory MAP, SDS</b>                     | 1.46                   | 1.04 – 2.03                    | 0.027          |
| <b>Diagnosis group</b>                                  |                        |                                |                |
| - <b>Glomerulopathies</b>                               | 1.00 (reference group) |                                |                |
| - <b>CAKUT</b>                                          | 0.30                   | 0.10 – 0.91                    | 0.032          |
| - <b>Other</b>                                          | 0.41                   | 0.10 – 1.75                    | 0.226          |
| <b>Baseline eGFR, ml/min/1.73m<sup>2</sup></b>          | 0.91                   | 0.87 – 0.94                    | <0.001         |
| <b>Baseline urinary protein/creatinine ratio, mg/mg</b> | 1.08                   | 0.89 – 1.32                    | 0.437          |
| <b>Ambulatory MAP reduction, SDS</b>                    | 0.56                   | 0.34 – 0.93                    | 0.024          |

**Supplementary table 8.** Sensitivity analysis: Adjusted cox proportional hazards model with association between proteinuria exposure over time and composite renal end point.

|                                                | <b>Hazard ratio</b>    | <b>95% confidence interval</b> | <b>P-value</b> |
|------------------------------------------------|------------------------|--------------------------------|----------------|
| <b>Proteinuria exposure over time:</b>         |                        |                                |                |
| - <b>Low</b>                                   | 1.00 (reference group) |                                |                |
| - <b>Medium</b>                                | 1.76                   | 0.77 – 4.03                    | 0.179          |
| - <b>High</b>                                  | 2.97                   | 1.31 – 6.70                    | 0.009          |
| <b>Male sex</b>                                | 0.72                   | 0.43 – 1.22                    | 0.227          |
| <b>Age, years</b>                              | 1.06                   | 0.99 – 1.14                    | 0.076          |
| <b>Baseline ambulatory MAP, SDS</b>            | 1.19                   | 1.01 – 1.41                    | 0.037          |
| <b>Diagnosis group</b>                         |                        |                                |                |
| - <b>Glomerulopathies</b>                      | 1.00 (reference group) |                                |                |
| - <b>CAKUT</b>                                 | 0.44                   | 0.24 – 0.80                    | 0.008          |
| - <b>Other</b>                                 | 0.83                   | 0.37 – 1.88                    | 0.663          |
| <b>Baseline eGFR, ml/min/1.73m<sup>2</sup></b> | 0.93                   | 0.91 – 0.95                    | <0.001         |
| <b>Ambulatory MAP reduction, SDS</b>           | 0.91                   | 0.76 – 1.09                    | 0.316          |



**The following are members of the ESCAPE Study Group – Local investigators (in alphabetical order of center):**

A. Anarat (Cukurova University School of Medicine, Balcali, Adana, Turkey); A. Bakkaloglu and F. Ozaltin (Hacettepe University Faculty of Medicine, Sıhhiye, Ankara, Turkey); A. Peco-Antic (University Children's Hospital, Belgrade, Serbia); U. Querfeld and J. Gellermann (Charité Children's Hospital, Berlin, Germany); P. Sallay (Sемmelweis University Budapest, First Department of Pediatrics, Budapest, Hungary); D. Drozd (Polish-American Children's Hospital, Jagiellonian University Collegium Medicum, Krakow, Poland); K.-E. Bonzel and A.-M. Wingen (University Hospital Essen, Essen, Germany); A. Zurowska and I. Balasz (Department of Pediatric and Adolescent Nephrology and Hypertension, Medical University of Gdansk, Gdansk, Poland); A. Trivelli and F. Perfumo (G. Gaslini Institute, Genova, Italy); D.E. Müller-Wiefel and K. Möller (University Children's Hospital Hamburg-Eppendorf, Hamburg, Germany); G. Offner and B. Enke (Hannover Medical School, Children's Hospital, Hannover, Germany); E. Wühl, C. Gimpel, O.Mehls, and F. Schaefer (Center for Pediatric and Adolescent Medicine, Heidelberg, Germany); S. Emre (University of Istanbul, Istanbul Medical Faculty, Capa, Istanbul, Turkey); S. Caliskan (Istanbul University, Cerrahpasa Medical Faculty, Istanbul, Turkey); S. Mir (Ege University Medical Faculty, Department of Pediatrics Bornova, Izmir, Turkey); S. Wygoda (Urban Hospital St. Georg, Leipzig, Germany); K. Hohbach-Hohenfellner (University Children's Hospital, Mainz, Germany); N. Jeck and G. Klaus (Department of Pediatrics, Philipps University Marburg, Marburg, Germany); G. Ardissino and S. Testa (IRCCS Ospedale Maggiore, Policlinico-Mangiagalli, Milano, Italy); G. Montini (Azienda Ospedaliera-Università di Padova, Padova, Italy); M. Charbit and P. Niaudet (Hospital Necker, Paris, France); A. Caldas-Afonso and A. Fernandes-Teixeira (Hospital S. Joao, Porto, Portugal); J. Dušek (Department of Pediatrics, University Hospital Motol, Prague, Czech Republic); M.C. Matteucci, S. Picca, and A. Mastrostefano (Ospedale Pediatrico Bambino Gesù, Rome, Italy); M. Wigger (University Children's Hospital, Rostock, Germany); U.B. Berg and G. Celsi (Karolinska Institute, Huddinge University Hospital, Stockholm, Sweden); M. Fischbach and J. Terzic (Hopitaux Universitaires de Strasbourg, Pédiatrie 1, Strasbourg, France); J. Fydryk and T. Urasinski (Pomeranian Academy of Medicine, Szczecin, Poland); R. Coppo and Licia Peruzzi (Ospedale Infantile Regina Margherita, Torino, Italy); K. Arbeiter (University Children's Hospital, Vienna, Austria); A. Jankauskienė (Vilnius University Pediatric Center, Vilnius, Lithuania); R. Grenda, M. Litwin, and R. Janas (Children's Memorial Health Hospital, Warsaw, Poland); G. Laube and T.J. Neuhaus (University Children's Hospital, Zürich, Switzerland).
